# Supplementary material
Source: publisher figshare collection journal article supplement (https://gsajournals.figshare.com/ndownloader/files/27643614)
Supplement: Supplementary file 1 [file 27643614]

## Sheet: Sheet1
Supplementary file 3. Least significant difference (LSD) tests for the linearized infection type (LIT) scores observed on ND495 × Largo recombinant inbred lines and their parental lines tested with race TRTTF of Puccinia graminis f. sp. tritici.
Line	No. of replicates	TRTTF LIT Mean	TRTTF LIT Std Dev
NL085	2	0	0
NL089	2	0	0
NL155	2	0	0
NL001	2	0.5	0.707107
NL023	2	0.5	0.707107
NL051	2	0.5	0.707107
NL128	2	0.5	0.707107
NL134	2	0.5	0.707107
NL166	2	0.5	0.707107
NL178	2	0.5	0.707107
NL181	2	0.5	0.707107
NL189	2	0.5	0.707107
Largo	2	1	0
NL011	2	1	0
NL013	2	1	0
NL019	2	1	0
NL020	2	1	0
NL033	2	1	0
NL036	2	1	0
NL043	2	1	0
NL049	2	1	0
NL050	2	1	0
NL052	2	1	0
NL053	2	1	0
NL066	2	1	0
NL081	2	1	0
NL087	2	1	0
NL094	2	1	0
NL097	2	1	0
NL109	2	1	0
NL110	2	1	0
NL116	2	1	0
NL136	2	1	0
NL141	2	1	0
NL143	2	1	0
NL146	1	1	.
NL159	2	1	0
NL162	2	1	0
NL177	2	1	0
NL187	2	1	0
NL190	2	1	0
NL193	2	1	0
NL207	2	1	0
NL209	2	1	0
NL213	2	1	0
NL218	2	1	0
NL220	2	1	0
NL230	2	1	0
NL233	2	1	0
NL026	2	1.5	0.707107
NL044	2	1.5	0.707107
NL126	2	1.5	0.707107
NL003	2	2	1.41421
NL112	2	2	0
NL122	2	2	1.41421
NL142	2	2	1.41421
NL147	2	2	1.41421
NL149	2	2	1.41421
NL172	2	2	1.41421
NL186	2	2	1.41421
NL038	2	2.5	2.12132
NL065	2	2.5	2.12132
NL080	2	2.5	0.707107
NL086	2	2.5	2.12132
NL104	2	2.5	2.12132
NL106	2	2.5	2.12132
NL123	2	2.5	2.12132
NL137	2	2.5	2.12132
NL138	2	2.5	0.707107
NL151	2	2.5	0.707107
NL204	2	2.5	2.12132
NL205	2	2.5	2.12132
NL215	2	2.5	2.12132
NL224	2	2.5	2.12132
NL029	2	3	1.41421
NL093	2	3	2.82843
NL098	2	3	2.82843
NL125	2	3	1.41421
NL156	2	3	2.82843
NL158	2	3	2.82843
NL161	2	3	1.41421
NL180	2	3	2.82843
NL216	2	3	0
NL225	2	3	2.82843
NL232	2	3	0
NL022	2	3.5	2.12132
NL045	2	3.5	0.707107
NL056	2	3.5	0.707107
NL095	2	3.5	0.707107
NL102	2	3.5	0.707107
NL176	2	3.5	0.707107
NL179	2	3.5	2.12132
NL201	2	3.5	0.707107
NL202	2	3.5	2.12132
NL210	2	3.5	0.707107
NL217	2	3.5	2.12132
NL007	2	4	0
NL015	2	4	1.41421
NL025	2	4	1.41421
NL028	2	4	1.41421
NL031	2	4	1.41421
NL059	2	4	0
NL088	2	4	1.41421
NL096	2	4	1.41421
NL103	2	4	0
NL105	2	4	1.41421
NL124	2	4	1.41421
NL129	2	4	1.41421
NL144	2	4	0
NL145	2	4	0
NL153	2	4	0
NL164	2	4	0
NL167	2	4	1.41421
NL212	2	4	0
NL214	2	4	0
NL219	2	4	0
NL002	2	4.5	0.707107
NL010	2	4.5	0.707107
NL032	2	4.5	0.707107
NL037	2	4.5	0.707107
NL040	2	4.5	0.707107
NL046	2	4.5	0.707107
NL058	2	4.5	0.707107
NL060	2	4.5	0.707107
NL061	2	4.5	0.707107
NL073	2	4.5	0.707107
NL091	2	4.5	0.707107
NL107	2	4.5	0.707107
NL117	2	4.5	0.707107
NL119	2	4.5	0.707107
NL120	2	4.5	0.707107
NL121	2	4.5	0.707107
NL130	2	4.5	0.707107
NL132	2	4.5	0.707107
NL133	2	4.5	0.707107
NL140	2	4.5	0.707107
NL154	2	4.5	0.707107
NL157	2	4.5	0.707107
NL163	2	4.5	0.707107
NL168	2	4.5	0.707107
NL170	2	4.5	0.707107
NL192	2	4.5	0.707107
NL195	2	4.5	0.707107
NL197	2	4.5	0.707107
NL200	2	4.5	0.707107
NL203	2	4.5	0.707107
NL223	2	4.5	0.707107
NL229	2	4.5	0.707107
NL235	2	4.5	0.707107
ND495	2	5	1.41421
NL004	2	5	0
NL005	2	5	0
NL006	2	5	0
NL009	2	5	0
NL014	2	5	0
NL024	2	5	0
NL027	2	5	0
NL041	2	5	0
NL047	2	5	0
NL048	2	5	0
NL055	2	5	0
NL057	2	5	0
NL063	2	5	0
NL068	2	5	0
NL069	2	5	0
NL075	2	5	0
NL077	2	5	1.41421
NL082	2	5	0
NL083	2	5	0
NL090	2	5	0
NL100	2	5	0
NL101	2	5	0
NL111	2	5	0
NL113	2	5	0
NL115	2	5	0
NL118	2	5	0
NL135	2	5	0
NL148	2	5	0
NL150	1	5	.
NL152	2	5	0
NL169	2	5	0
NL171	2	5	0
NL173	2	5	0
NL174	2	5	0
NL175	2	5	0
NL182	2	5	0
NL199	2	5	0
NL206	2	5	0
NL222	2	5	0
NL228	2	5	0
NL008	2	5.5	0.707107
NL034	2	5.5	0.707107
NL042	2	5.5	0.707107
NL062	2	5.5	0.707107
NL139	2	5.5	0.707107
NL160	2	5.5	2.12132
NL184	2	5.5	0.707107
NL185	2	5.5	0.707107
NL188	2	5.5	0.707107
NL191	2	5.5	0.707107
NL194	2	5.5	0.707107
NL234	2	5.5	0.707107
NL084	2	6	0
NL127	2	6	1.41421
NL035	2	6.5	0.707107
NL114	2	6.5	0.707107
NL070	2	7.0*	0
NL074	2	7.0*	1.41421
NL183	2	7.0*	0
NL017	2	7.5*	0.707107
NL018	2	7.5*	0.707107
NL067	2	8.0*	0
NL072	1	8.0*	.
NL076	2	8.0*	1.41421
NL099	2	8.0*	0
NL108	2	8.0*	0
NL196	2	8.0*	0
NL016	2	8.5*	0.707107
NL021	2	8.5*	0.707107
NL071	2	8.5*	0.707107
NL208	2	8.5*	0.707107
NL226	2	8.5*	0.707107
NL030	2	9.0*	0
NL064	2	9.0*	0
NL078	2	9.0*	0
NL092	2	9.0*	0
NL165	2	9.0*	0
NL221	2	9.0*	0
Critical t		1.97061
LSD (α = 0.05)		1.8732
* Significantly different from ND495 at 0.05 level of probability (LSD).
